# Supplementary material for: Development and Reliability of a Measure of Clinician Competence in Providing Illness Management and Recovery
Source: Atypon-hosted journal article supplement (doi:10.1176/appi.ps.201100144), 2012-08-01
Supplement: pss6308_0772_ds.pdf [file pss6308_0772_ds.pdf]

**Appendix: The Illness Management & Recovery Treatment Integrity Scale (IT-IS)**

| <b>Item</b>                                                               | <b>1</b>                       | <b>2</b>                                                                                                  | <b>3</b>                                                                                            | <b>4</b>                                                                                                         | <b>5</b>                                                                                                      |
|---------------------------------------------------------------------------|--------------------------------|-----------------------------------------------------------------------------------------------------------|-----------------------------------------------------------------------------------------------------|------------------------------------------------------------------------------------------------------------------|---------------------------------------------------------------------------------------------------------------|
|                                                                           | <b>Unsatisfactory</b>          | <b>Needs Improvement</b>                                                                                  | <b>Satisfactory</b>                                                                                 | <b>Very Good</b>                                                                                                 | <b>Excellent</b>                                                                                              |
| <b>1) Therapeutic Relationship</b>                                        | Clinician fails to use methods | Clinician applies either insufficient or inappropriate methods, and/or with limited skill and flexibility | Clinician applies sufficient range of methods with skill and flexibility. Some difficulties evident | Clinician systematically applies an appropriate range of methods in a creative, resourceful and effective manner | Clinician uses an excellent range of application <b>or</b> successful application in the face of difficulties |
| <b>2) Recovery Orientation</b>                                            | Clinician fails to use methods | Clinician applies either insufficient or inappropriate methods, and/or with limited skill and flexibility | Clinician applies sufficient range of methods with skill and flexibility. Some difficulties evident | Clinician systematically applies an appropriate range of methods in a creative, resourceful and effective manner | Clinician uses an excellent range of application <b>or</b> successful application in the face of difficulties |
| <b>3) Involving All Group Members</b><br><br><input type="checkbox"/> N/A | Clinician fails to use methods | Clinician applies either insufficient or inappropriate methods, and/or with limited skill and flexibility | Clinician applies sufficient range of methods with skill and flexibility. Some difficulties evident | Clinician systematically applies an appropriate range of methods in a creative, resourceful and effective manner | Clinician uses an excellent range of application <b>or</b> successful application in the face of difficulties |
|                                                                           |                                |                                                                                                           |                                                                                                     |                                                                                                                  |                                                                                                               |

|                                                                                              |                                                        |                                                                                                                  |                                                                                                            |                                                                                                                         |                                                                                                                                                   |
|----------------------------------------------------------------------------------------------|--------------------------------------------------------|------------------------------------------------------------------------------------------------------------------|------------------------------------------------------------------------------------------------------------|-------------------------------------------------------------------------------------------------------------------------|---------------------------------------------------------------------------------------------------------------------------------------------------|
| <p><b>4) Enlisting Support Between Group Members</b></p> <p><input type="checkbox"/> N/A</p> | <p>Clinician fails to use methods</p>                  | <p>Clinician applies either insufficient or inappropriate methods, and/or with limited skill and flexibility</p> | <p>Clinician applies sufficient range of methods with skill and flexibility. Some difficulties evident</p> | <p>Clinician systematically applies an appropriate range of methods in a creative, resourceful and effective manner</p> | <p>Clinician uses an excellent range of application <b>or</b> successful application in the face of difficulties</p>                              |
| <p><b>5) Involvement of Significant Other</b></p>                                            | <p>No involvement of significant others in any way</p> | <p>Significant others are mentioned, but it is unclear whether they are directly involved</p>                    | <p>Clinician elicits significant other involvement <b>or</b> reinforces it when it arises</p>              | <p>Clinician elicits significant other involvement <b>and</b> reinforces it when it arises</p>                          | <p>Clinician elicits significant other involvement <b>and</b> reinforces it when it arises <b>and</b> there is a plan for further involvement</p> |

|                                                     |                                                |                                                                                                                                                      |                                                                                                                                                                                                                |                                                                                                                                                                                         |                                                                                                                                                                                                   |
|-----------------------------------------------------|------------------------------------------------|------------------------------------------------------------------------------------------------------------------------------------------------------|----------------------------------------------------------------------------------------------------------------------------------------------------------------------------------------------------------------|-----------------------------------------------------------------------------------------------------------------------------------------------------------------------------------------|---------------------------------------------------------------------------------------------------------------------------------------------------------------------------------------------------|
| <b>6)</b><br><b>Structure/Efficient Use of Time</b> | Session is not structured                      | <ul style="list-style-type: none"> <li>• <i>Some</i> of the recommended items are included</li> <li>• Time is <i>not</i> used efficiently</li> </ul> | <ul style="list-style-type: none"> <li>• <i>Some</i> of the recommended items are included</li> <li>• Time is <i>mostly</i> used efficiently</li> </ul>                                                        | <ul style="list-style-type: none"> <li>• <i>Most</i> of the recommended items are included</li> <li>• Time <i>is</i> used efficiently</li> <li>• All critical items included</li> </ul> | <ul style="list-style-type: none"> <li>• <i>All/Almost All</i> of the recommended items are included</li> <li>• Time <i>is</i> used efficiently</li> <li>• All critical items included</li> </ul> |
| <b>7) Use of Structured IMR Curriculum</b>          | No material and session is not relevant to IMR | Limited material that is not related to IMR<br><br><b>Or</b><br><br>No material and session is tangentially related to IMR                           | Structured curriculum material which is unrelated to IMR<br><br><b>Or</b><br>Limited material used to guide discussion tangentially IMR-related<br><br><b>Or</b><br>No material, but discussion is IMR-related | Structured curriculum material, which is tangentially related to IMR<br><br><b>Or</b><br><br>Limited material used to guide IMR-relevant discussion                                     | Structured, IMR-related material is the focus of session                                                                                                                                          |

|                                                |                                                         |                                                                                                           |                                                                                                     |                                                                                                                  |                                                                                                               |
|------------------------------------------------|---------------------------------------------------------|-----------------------------------------------------------------------------------------------------------|-----------------------------------------------------------------------------------------------------|------------------------------------------------------------------------------------------------------------------|---------------------------------------------------------------------------------------------------------------|
| <b>8) Goals</b>                                | Clinician fails to use methods                          | Clinician applies either insufficient or inappropriate methods, and/or with limited skill and flexibility | Clinician applies sufficient range of methods with skill and flexibility. Some difficulties evident | Clinician systematically applies an appropriate range of methods in a creative, resourceful and effective manner | Clinician uses an excellent range of application <b>or</b> successful application in the face of difficulties |
| <b>9) Weekly Action Planning</b>               | Homework and/or action steps meets 0-1 indicators below | Homework and/or action steps are being developed, but only fit 2-3 indicators below                       | Homework and/or action steps are being developed, but only fit 4-6 indicators below                 | Homework and/or action steps are being developed, but fits 7 indicators below                                    | Homework and/or action steps are being developed, and exhibit all indicators of excellence below              |
| <b>10) Action Plan Review</b>                  | Clinician fails to use methods                          | Clinician applies either insufficient or inappropriate methods, and/or with limited skill and flexibility | Clinician applies sufficient range of methods with skill and flexibility. Some difficulties evident | Clinician systematically applies an appropriate range of methods in a creative, resourceful and effective manner | Clinician uses an excellent range of application <b>or</b> successful application in the face of difficulties |
| <b>11) Motivational Enhancement Strategies</b> | Clinician fails to use methods                          | Clinician applies either insufficient or inappropriate methods, and/or with limited skill and flexibility | Clinician applies sufficient range of methods with skill and flexibility. Some difficulties evident | Clinician systematically applies an appropriate range of methods in a creative, resourceful and effective manner | Clinician uses an excellent range of application <b>or</b> successful application in the face of difficulties |

|                                                           |                                |                                                                                                           |                                                                                                     |                                                                                                                  |                                                                                                               |
|-----------------------------------------------------------|--------------------------------|-----------------------------------------------------------------------------------------------------------|-----------------------------------------------------------------------------------------------------|------------------------------------------------------------------------------------------------------------------|---------------------------------------------------------------------------------------------------------------|
| <b>12) Educational Strategies</b>                         | Clinician fails to use methods | Clinician applies either insufficient or inappropriate methods, and/or with limited skill and flexibility | Clinician applies sufficient range of methods with skill and flexibility. Some difficulties evident | Clinician systematically applies an appropriate range of methods in a creative, resourceful and effective manner | Clinician uses an excellent range of application <b>or</b> successful application in the face of difficulties |
| <b>13) Cognitive-Behavioral Techniques</b>                | Clinician fails to use methods | Clinician applies either insufficient or inappropriate methods, and/or with limited skill and flexibility | Clinician applies sufficient range of methods with skill and flexibility. Some difficulties evident | Clinician systematically applies an appropriate range of methods in a creative, resourceful and effective manner | Clinician uses an excellent range of application <b>or</b> successful application in the face of difficulties |
| <i>Optional Items</i>                                     |                                |                                                                                                           |                                                                                                     |                                                                                                                  |                                                                                                               |
| <b>14) Relapse Prevention Training</b>                    | Clinician fails to use methods | Clinician applies either insufficient or inappropriate methods, and/or with limited skill and flexibility | Clinician applies sufficient range of methods with skill and flexibility. Some difficulties evident | Clinician systematically applies an appropriate range of methods in a creative, resourceful and effective manner | Clinician uses an excellent range of application <b>or</b> successful application in the face of difficulties |
| <b>15) Behavioral Tailoring for Medication Management</b> | Clinician fails to use methods | Clinician applies either insufficient or inappropriate methods, and/or with limited skill and flexibility | Clinician applies sufficient range of methods with skill and flexibility. Some difficulties evident | Clinician systematically applies an appropriate range of methods in a creative, resourceful and effective manner | Clinician uses an excellent range of application <b>or</b> successful application in the face of difficulties |

|                                   |                                |                                                                                                           |                                                                                                     |                                                                                                                  |                                                                                                               |
|-----------------------------------|--------------------------------|-----------------------------------------------------------------------------------------------------------|-----------------------------------------------------------------------------------------------------|------------------------------------------------------------------------------------------------------------------|---------------------------------------------------------------------------------------------------------------|
| <b>16) Coping Skills Training</b> | Clinician fails to use methods | Clinician applies either insufficient or inappropriate methods, and/or with limited skill and flexibility | Clinician applies sufficient range of methods with skill and flexibility. Some difficulties evident | Clinician systematically applies an appropriate range of methods in a creative, resourceful and effective manner | Clinician uses an excellent range of application <b>or</b> successful application in the face of difficulties |
|-----------------------------------|--------------------------------|-----------------------------------------------------------------------------------------------------------|-----------------------------------------------------------------------------------------------------|------------------------------------------------------------------------------------------------------------------|---------------------------------------------------------------------------------------------------------------|
